# Supplementary material for: Epigenetic Alterations of Chromosome 3 Revealed by NotI-Microarrays in Clear Cell Renal Cell Carcinoma
Source: Biomed Res Int. 2014 May 22;2014:735292. doi: 10.1155/2014/735292 (PMC4054851; doi:10.1155/2014/735292)
Supplement: Supplementary file 1 — Supplementary Table 1. Summary of hybridization data of DNA from 23 clear cell renal cell carcinoma samples on chromosome 3 specific NotI-microarrays. [file 735292.f1.xls]

## Sheet: Лист1
Supplementary Table 1. Summary hybridization data of DNA from 23 clear cell renal cell carcinoma samples to NotI-microarrays.
* - gene names separated by “/” mean that NotI-site is common for these two genes.
№	NotI-site	Gene*	Gene Localization	Methylation/ Deletion		Amplification/ Demethylation		Retention		No info
				N	%	N	%	N	%	N	%
1	NL6-FJ5R (C)	LRRN1	3p26.2	10	43.4783	0	0	11	47.8261	2	8.69565
2	NR5-IH18RS	BHLHE40	3p26.1	3	13.0435	0	0	13	56.5217	7	30.4348
3	NR5-GP13R (C)	LMCD1	3p26-24	0	0	0	0	20	86.9565	3	13.0435
4	NL2B001R (D)	LOC440944/SETD5	3p25.3	0	0	0	0	22	95.6522	1	4.34783
5	NL1-BH17R (C)	LHFPL4/MTMR14	3p25.3	0	0	0	0	22	95.6522	1	4.34783
6	NR1-WA8R (C)	IL17RE	3p25.3	0	0	0	0	23	100	0	0
7	NL1106R (D)	IL17RC	3p25.3	0	0	0	0	22	95.6522	1	4.34783
8	NRLA404R (U)	VHL	3p25.3	7	30.4348	0	0	16	69.5652	0	0
9	NRLa098R (S)	IRAK2	3p25.3	0	0	0	0	22	95.6522	1	4.34783
10	NLMA188R (D)	TSEN2	3p25.2	0	0	0	0	22	95.6522	1	4.34783
11	NR1-NK17R (C)	CAND2	3p25.2	0	0	0	0	23	100	0	0
12	HSJ4-AB7R (C)	RPL32/IQSEC1	3p25.2	4	17.3913	0	0	12	52.1739	7	30.4348
13	NLMP217R (D)	IQSEC1	3p25.2	3	13.0435	0	0	19	82.6087	1	4.34783
14	NR1-XM13C	IQSEC1	3p25.2	6	26.087	0	0	4	17.3913	13	56.5217
15	NRL2062R (D)	NUP210	3p25.1	1	4.34783	0	0	21	91.3043	1	4.34783
16	NR1-KJ5R (C)	FBLN2	3p25.1	0	0	0	0	11	47.8261	12	52.1739
17	NL1-VJ14R (C)	LOC285375	3p25.1	0	0	0	0	22	95.6522	1	4.34783
18	NR1-PL22R (C)	LOC285375	3p25.1	3	13.0435	0	0	19	82.6087	1	4.34783
19	NL4-BK12R (C)	WNT7A	3p25	2	8.69565	0	0	17	73.913	4	17.3913
20	NLMP199R (D)	GRIP2/C3orf19	3p25.1	0	0	0	0	23	100	0	0
21	NL4-DP2RS	FGD5	3p25.1	4	17.3913	0	0	9	39.1304	10	43.4783
22	NL1A177R (143D)	SH3BP5	3p24.3	0	0	0	0	23	100	0	0
23	APC1R	EAF1/METTL6	3p25.1	1	4.34783	0	0	21	91.3043	1	4.34783
24	NL1G261R (D)	ANKRD28	3p25.1	2	8.69565	0	0	20	86.9565	1	4.34783
25	NR1-AB20R (C)	ANKRD28	3p25.1	1	4.34783	0	0	22	95.6522	0	0
26	NL4-AP18R (C)	PLCL2	3p24.3	4	17.3913	0	0	18	78.2609	1	4.34783
27	NL1-GC10C	HMGB1L5 (Pseudo)	3p24	1	4.34783	0	0	21	91.3043	1	4.34783
28	NR1-WF18R (C)	UBE2E2	3p24.2	1	4.34783	0	0	16	69.5652	6	26.087
29	NL1-CJ4R (C)	NKIRAS1/RPL15	3p24.2	13	56.5217	0	0	10	43.4783	0	0
30	NL1-DG8R	THRB	3p24.2	1	4.34783	0	0	17	73.913	5	21.7391
31	NR1-KA8R (C)	THRB	3p24.2	1	4.34783	0	0	22	95.6522	0	0
32	NL4-BB6R (C)	THRB	3p24.2	3	13.0435	0	0	17	73.913	3	13.0435
33	NL3-CA11RS	LRRC3B	3p24	10	43.4783	0	0	10	43.4783	3	13.0435
34	NRLa082R (D)	STT3B	3p23	1	4.34783	0	0	22	95.6522	0	0
35	NR5-FH23R (C)	STT3B	3p23	1	4.34783	0	0	18	78.2609	4	17.3913
36	NL124R (D)	OSBPL10/ZNF860	3p22.3	2	8.69565	0	0	21	91.3043	0	0
37	NR5-FK11R (C)	CMTM8	3p22.3	1	4.34783	0	0	21	91.3043	1	4.34783
38	NRL-063R (D)	CMTM6	3p22.3	0	0	0	0	20	86.9565	3	13.0435
39	NR1-EP7RS	CLASP2	3p22.3	1	4.34783	0	0	22	95.6522	0	0
40	NLMZ142R (D)	TRANK1	3p22.2	1	4.34783	0	0	22	95.6522	0	0
41	NL1A401R (D)	ITGA9	3p21.3	2	8.69565	0	0	16	69.5652	5	21.7391
42	NLJ-003RD	RBSP3 (CTDSPL)	3p21.3	8	34.7826	0	0	5	21.7391	10	43.4783
43	NL3a019r (d)	SLC22A13	3p21.3	0	0	0	0	20	86.9565	3	13.0435
44	AP20D (NLMP220D)	SCN5A	3p21	0	0	0	0	23	100	0	0
45	NL3003R (U)	GORASP1/TTC21A	3p22-p21.33	8	34.7826	0	0	5	21.7391	10	43.4783
46	NL1308R (D)	MOBP	3p22.1	0	0	0	0	22	95.6522	1	4.34783
47	NR1-NK20R (C)	EIF1B	3p22.1	0	0	0	0	23	100	0	0
48	NR5-IB17R (C)	HIGD1A	3p22.1	0	0	0	0	23	100	0	0
49	NR1-PA6R (C)	FAM198A	3p22.1	0	0	0	0	22	95.6522	1	4.34783
50	NL3A009R (D)	SNRK	3p22.1	1	4.34783	0	0	17	73.913	5	21.7391
51	NL1232R (S)	ABHD5	3p21	0	0	0	0	23	100	0	0
52	NR1-AN24RS	ABHD5/C3orf77	3p21	5	21.7391	0	0	8	34.7826	10	43.4783
53	NL2B007R (D)	ZDHHC3/EXOSC7	3p21.31	0	0	0	0	23	100	0	0
54	NL1320R (S)	SACM1L	3p21.3	1	4.34783	0	0	21	91.3043	1	4.34783
55	NL3A010R (D)	SLC6A20	3p21.3	1	4.34783	0	0	22	95.6522	0	0
56	NLM-067R (D)	PRSS42/MYL3	3p21.31	1	4.34783	0	0	20	86.9565	2	8.69565
57	NL3A006R (D)	NBEAL2	3p21.31	5	21.7391	0	0	5	21.7391	13	56.5217
58	NR1-NJ3R (C)	CSPG5	3p21.3	0	0	0	0	23	100	0	0
59	J31A212R	DHX30	3p21.31	0	0	0	0	23	100	0	0
60	J31A219D	MAP4	3p21	0	0	0	0	22	95.6522	1	4.34783
61	NR1-KF21R (C)	MAP4	3p21	0	0	0	0	23	100	0	0
62	NR1-PM22R (C)	SHISA5	3p21.31	0	0	0	0	23	100	0	0
63	NL6-II3R	USP19	3p21.31	0	0	0	0	23	100	0	0
64	NL3A014R (D)	RHOA/TCTA	3p21.3	0	0	0	0	23	100	0	0
65	J32Z148D	RHOA/TCTA	3p21	0	0	0	0	23	100	0	0
66	NRL1	SEMA3F	3p21.3	0	0	0	0	23	100	0	0
67	NL3A001R (D)	GNAI2	3p21.31	5	21.7391	0	0	7	30.4348	11	47.8261
68	NL1G210R (D)	MAPKAPK3	3p21.3	0	0	0	0	23	100	0	0
69	NL1Z216R (D)	MANF	3p21.1	0	0	0	0	23	100	0	0
70	NRLA097R	RBM15B	3p21.2	0	0	0	0	23	100	0	0
71	NR1-WH9R (C)	RRP9/PARP3	3p21.2	0	0	0	0	22	95.6522	1	4.34783
72	NRLA113R (D)	GPR62	3p21.1	0	0	0	0	23	100	0	0
73	NLM252R (D)	PCBP4	3p21	0	0	0	0	23	100	0	0
74	NL1243R (D)	ABHD14A	3p21.1	0	0	0	0	23	100	0	0
75	NL1245R (D)	ACY1	3p21.1	0	0	0	0	23	100	0	0
76	NR1-NC7RS	PPM1M	3p21.2	5	21.7391	0	0	9	39.1304	9	39.1304
77	NL2G008R (D)	WDR82	3p21.2	0	0	0	0	23	100	0	0
78	AP32R (D)	PHF7/BAP1	3p21.1	0	0	0	0	23	100	0	0
79	NRL-143D	GLT8D1/SPCS1	3p21.1	2	8.69565	0	0	21	91.3043	0	0
80	NR1-DH18RS	CACNA2D3	3p21.1	0	0	0	0	22	95.6522	1	4.34783
81	NRL091R (S)	C3orf63	3p14.3	2	8.69565	0	0	21	91.3043	0	0
82	AP2R (D)	ARF4	3p21.2 - p21.1	1	4.34783	0	0	21	91.3043	1	4.34783
83	NLMP223R (D)	ABHD6	3p14.3	0	0	0	0	23	100	0	0
84	NL1A358R (D)	ATXN7/THOC7	3p21.1-p12	0	0	0	0	23	100	0	0
85	NR1-NJ9R (C)	PRICKLE2	3p14.1	5	21.7391	0	0	16	69.5652	2	8.69565
86	NR5-FL20R (C)	LRIG1	3p14	1	4.34783	0	0	22	95.6522	0	0
87	NL1-ZP13R (C)	KBTBD8	3p14	2	8.69565	0	0	20	86.9565	1	4.34783
88	NL4-BN15R (C)	FAM19A4	3p14.1	0	0	0	0	22	95.6522	1	4.34783
89	NL2B063R (D)	FRMD4B/MITF	3p14.1	0	0	0	0	23	100	0	0
90	NL1-YL16RS	MITF	3p14.2-p14.1	3	13.0435	1	4.34783	11	47.8261	8	34.7826
91	NL1-BA6R	FOXP1	3p14.1	6	26.087	0	0	15	65.2174	2	8.69565
92	NL6-AF21R (C)	PDZRN3	3p13	0	0	0	0	23	100	0	0
93	924Z021R (D)	FRG2C	3p12.3	1	4.34783	0	0	22	95.6522	0	0
94	NR5-GE23R (C)	ROBO2	3p12.3	0	0	0	0	23	100	0	0
95	NL6-HG15R (C)	ROBO1	3p12.1	0	0	0	0	19	82.6087	4	17.3913
96	NR1-WE11RS	CGGBP1	3p12-p11.1	3	13.0435	0	0	12	52.1739	8	34.7826
97	NR5-FK16RS	MINA	3q11.2	2	8.69565	0	0	14	60.8696	7	30.4348
98	NL6-F020R (C)	DCBLD2	3q12.1;3	1	4.34783	0	0	17	73.913	5	21.7391
99	NLMA202R (D)	NIT2	3q12.2	0	0	0	0	23	100	0	0
100	NL1268R (P65D)	TMEM45A	3q12.2	0	0	0	0	23	100	0	0
101	924Z094R (D)	TFG	3q12.2	0	0	0	0	23	100	0	0
102	NLMZ(A)134R(S)	BBX	3q13.1	1	4.34783	0	0	20	86.9565	2	8.69565
103	NL3-CI2R (C)	LOC285205	3q13.12	3	13.0435	0	0	13	56.5217	7	30.4348
104	NLM187R (D)	BOC	3q13.2	1	4.34783	0	0	21	91.3043	1	4.34783
105	NL2273R (D)	B4GALT4	3q13.3	0	0	0	0	23	100	0	0
106	NR1-WD23R (C)	LRRC58	3q13.33	0	0	0	0	23	100	0	0
107	NR5-FG18R (C)	FSTL1	3q13.33	1	4.34783	0	0	21	91.3043	1	4.34783
108	NL2B006R (D)	SEMA5B	3q21.1	1	4.34783	0	0	22	95.6522	0	0
109	NL1-GK21R (C)	ROPN1/KALRN	3q13.3	1	4.34783	0	0	12	52.1739	10	43.4783
110	NR5-CD6R (C)	ITGB5	3q21.2	0	0	0	0	22	95.6522	1	4.34783
111	NL4-BC8R (C)	ALDH1L1	3q21.3	4	17.3913	1	4.34783	17	73.913	1	4.34783
112	NL1290R (D)	CHST13	3q21.3	2	8.69565	0	0	20	86.9565	1	4.34783
113	NL1-YJ5R (C)	С3orf46/CHCHD6	3q21.3	1	4.34783	1	4.34783	16	69.5652	5	21.7391
114	NR1-NK11R (C)	CHCHD6	3q21.3	0	0	0	0	23	100	0	0
115	NL2A230R	ABTB1/PODXL2	3q21	1	4.34783	0	0	22	95.6522	0	0
116	NL1-DE18R	GATA2	3q21.3	3	13.0435	0	0	10	43.4783	10	43.4783
117	NL4-BH3R (C)	GATA2	3q21.3	2	8.69565	0	0	9	39.1304	12	52.1739
118	NR5-IG11RS	C3orf27	3q21	0	0	0	0	22	95.6522	1	4.34783
119	NL2B023R (NLMP23D)	C3orf27	3q21	0	0	0	0	23	100	0	0
120	AP4R (D)	RPN1	3q21.3	0	0	0	0	23	100	0	0
121	NRL084R (D)	RPN1/RAB7A	3q21.3	0	0	0	0	23	100	0	0
122	NLMP7R (D)	RAB7A	3q21.3	0	0	0	0	23	100	0	0
123	NR1-PH14R (C)	KIAA1257	3q21.3	0	0	0	0	22	95.6522	1	4.34783
124	NR1-EP10R (C)	PLXND1	3q22.1	0	0	0	0	22	95.6522	1	4.34783
125	NL1P9R (Z206D)	TMCC1	3q22.1	0	0	0	0	22	95.6522	1	4.34783
126	NL4-DJ11RS	TRH	3q13.3-q21	1	4.34783	0	0	19	82.6087	3	13.0435
127	NR1-WD21R (C)	NEK11/NUDT16	3q22.1	0	0	0	0	1	4.34783	22	95.6522
128	AP45R (NLMZ073D)	TMEM108	3q21	1	4.34783	0	0	22	95.6522	0	0
129	NRL124R (D)	TOPBP1	3q22.1	1	4.34783	0	0	22	95.6522	0	0
130	NR5-IG2R (C)	KY	3q22.2	0	0	0	0	12	52.1739	11	47.8261
131	NL1A079R (D)	EPHB1	3q21-q23	4	17.3913	0	0	13	56.5217	6	26.087
132	NL1-FK10R (C)	PPP2R3A	3q22.1	2	8.69565	0	0	9	39.1304	12	52.1739
133	NL2G249R (D)	NCK1	3q21	0	0	0	0	20	86.9565	3	13.0435
134	NR1-WJ2RS	SOX14	3q22-q23	0	0	0	0	23	100	0	0
135	NR1-WL7R (C)	DZIP1L	3q22.3	0	0	0	0	23	100	0	0
136	NL1-DJ10R (C)	ARMC8	3q22.3	0	0	0	0	23	100	0	0
137	NL1A278R (D)	MRAS	3q22.3	0	0	0	0	23	100	0	0
138	NR1-NO14R (C)	FOXL2/C3orf72	3q23	0	0	0	0	23	100	0	0
139	NL1-YD3R (C)	ACPL2	3q23	0	0	0	0	23	100	0	0
140	NR5-KB9R (C)	GK5	3q23	0	0	0	0	23	100	0	0
141	NL6-FB5R (C)	PAQR9	3q23	0	0	0	0	23	100	0	0
142	NR5-IO11R (C)	PAQR9	3q23	1	4.34783	0	0	12	52.1739	10	43.4783
143	NR1-OG4R (C)	SLC9A9/C3orf58	3q24	0	0	0	0	23	100	0	0
144	NR1-PD1R	ZIC4	3q24	4	17.3913	0	0	13	56.5217	6	26.087
145	NL2Z262R (221S)	SIAH2	3q25	0	0	0	0	23	100	0	0
146	NL4-BI4RS	RAP2B	3q25.2	1	4.34783	0	0	17	73.913	5	21.7391
147	NL1-VC9R (C)	GPR149	3q25.2	0	0	1	4.34783	1	4.34783	21	91.3043
148	NRL090R (S)	GMPS	3q24	0	0	0	0	22	95.6522	1	4.34783
149	NRLZ271R (D)	SSR3	3q25.31	0	0	0	0	21	91.3043	2	8.69565
150	NR1-NM7R (C)	B3GALNT1	3q25	0	0	0	0	22	95.6522	1	4.34783
151	NLMP208R (D)	FNDC3B	3q26.31	0	0	0	0	23	100	0	0
152	NRLa114R (D)	TBL1XR1	3q26.32	0	0	0	0	23	100	0	0
153	NLMP137R (D)	PIK3CA	3q26.3	0	0	0	0	23	100	0	0
154	NL1-ZD4R	SOX2	3q26.3-27	2	8.69565	0	0	15	65.2174	6	26.087
155	924A053R (D)	ATP11B	3q27	0	0	0	0	23	100	0	0
156	NLMP224R (D)	ATP11B	3q27	0	0	0	0	23	100	0	0
157	NLMP91R (D)	LAMP3	3q26.3-q27	0	0	0	0	23	100	0	0
158	NL1-BM8R (C)	B3GNT5/MCF2L2	3q28	0	0	0	0	23	100	0	0
159	NR5-CM3R (C)	PARL	3q27.1	0	0	0	0	23	100	0	0
160	NL2B011R (D)	ABCC5	3q27	0	0	0	0	23	100	0	0
161	NRL117R (D)	VWA5B2	3q27.1	0	0	0	0	23	100	0	0
162	NL2B017R (D)	EIF4G1	3q27-qter	0	0	0	0	23	100	0	0
163	NL1088R (D)	CLCN2	3q27-q28	0	0	0	0	23	100	0	0
164	NR1-WB21R (C)	EPHB3	3q21-qter	0	0	0	0	23	100	0	0
165	NL1Z302R (D)	MAGEF1	3q13	0	0	0	0	23	100	0	0
166	AP19R (S)	ETV5	3q28	0	0	0	0	23	100	0	0
167	NL1-GJ12R (C)	ST6GAL1	3q27-28	1	4.34783	0	0	19	82.6087	3	13.0435
168	NR1-AK24R	BCL6	3q27	3	13.0435	0	0	17	73.913	3	13.0435
169	NL1A313R (S)	LOC339929	3q27.3	0	0	0	0	22	95.6522	1	4.34783
170	NL1-YH24R (S)	LEPREL1	3q28	0	0	0	0	23	100	0	0
171	NR1-NH1R (C)	FGF12	3q28	3	13.0435	0	0	19	82.6087	1	4.34783
172	NL2B060R (D)	HES1 (LOC100505920)	3q28-q29	0	0	0	0	22	95.6522	1	4.34783
173	AP34R (D)	LOC100507391	3q29	0	0	0	0	23	100	0	0
174	NR1-AM11R (C)	C3orf21	3q29	0	0	0	0	22	95.6522	1	4.34783
175	NLG26R (D)	TNK2/APOD	3q26.2-qter/3q29	1	4.34783	0	0	22	95.6522	0	0
176	NL2Z252R (D)	TFRC	3q29	0	0	0	0	22	95.6522	1	4.34783
177	HSJ-DP22RS	CEP19	3q29	0	0	0	0	23	100	0	0
178	NLMA216R (S)	CEP19/PIGX	3q29	0	0	0	0	22	95.6522	1	4.34783
179	NRL094R (D)	BDH1	3q29	0	0	0	0	23	100	0	0
180	NR1-PF24RS	LRCH3	3q29	1	4.34783	0	0	21	91.3043	1	4.34783
